# Supplementary material for: Antidiabetic Effect and Mode of Action of Cytopiloyne
Source: Hindawi journal article supplement (doi:10.1155/2013/685642), 2013-01-01

## Supplemental data

### Anti-diabetic effect and mode of action of cytopiloyne

Cicero Lee-Tian Chang<sup>1</sup>, Hsien-Yueh Liu<sup>1</sup>, Tien-Fen Kuo<sup>2</sup>, Yi-Jou Hsu<sup>2</sup>, Ming-Yi Shen<sup>3</sup>, Chien-Yuan Pan<sup>4</sup>, and Wen-Chin Yang<sup>2,4,5\*</sup>

<sup>1</sup>Department of Veterinary Medicine, National Chung Hsing University, Taiwan;

<sup>2</sup>Agricultural Biotechnology Research Center, Academia Sinica, Taiwan; <sup>3</sup>Research Center, China Medical University and Hospital; Graduate Institute of Clinical Medical Sciences, China Medical University, Taiwan;

<sup>4</sup>Institute of Zoology, National Taiwan University, Taiwan;

<sup>5</sup>Department of Life Science, National Chung Hsing University, Taiwan.

**Supplemental Table 1.** Survival rate of db/db mice during long-term treatments.

| Treatment           | Survival rate (%) |     |     |           |
|---------------------|-------------------|-----|-----|-----------|
|                     | 6                 | 10  | 20  | 22 (week) |
| Vehicle (n=4)       | 100               | 100 | 75  | 75        |
| GLM 2.5 mg/kg (n=4) | 100               | 100 | 100 | 75        |
| CP 0.5 mg/kg (n=7)  | 100               | 100 | 100 | 100       |
| CP 2.5 mg/kg (n=7)  | 100               | 100 | 100 | 100       |

Each group of db/db mice aged at 6 to 8 weeks were tube-fed with vehicle, cytopiloyne (0.5 or 2.5 mg/kg/day) or glimepiride (2.5 mg/kg/day) once a day. Survival rate was monitored for the indicated time. The number of mice used is indicated in parentheses in the first column.

20 **Supplemental Figure Legends**

21 **Supplemental Figure 1. GF109203X can inhibit PKC $\alpha$  phosphorylation in  $\beta$**   
22 **cells.** RIN-m5F cells were pre-treated with GF109203X (GF), a pharmacological  
23 agent, for 24 h and stimulated with PMA for 5 min. The cells were lysed and  
24 underwent Western blot with anti-phospho-PKC $\alpha$  and anti-actin antibodies.

25

26 **Supplemental Figure 2. Prophylactic effect of cytopiloyne in db/db mice.** (A)  
27 Two groups of diabetes-free db/db mice aged 4 weeks were daily tube-fed with  
28 vehicle (1  $\mu$ l DMSO per 1 ml of PBS) or cytopiloyne (CP, 0.5 mg/kg), for 4  
29 weeks. Postprandial blood glucose levels in these mice were measured. (B)  
30 Blood insulin levels from the above mice (A) were measured. Results from 3  
31 independent experiments are expressed as mean  $\pm$  SEM, and  $P$  (\*) < 0.05 was  
32 considered to be statistically significant. The mouse number (n) is indicated in  
33 parentheses.

34

35 **Supplemental Figure 3. Cytopiloyne dose-dependently enhances insulin**  
36 **release in the medium containing different doses of glucose.** Rat pancreatic  
37 islets were incubated with KRB buffer containing vehicle, glimepiride (GLM, 10  
38  $\mu$ M) or cytopiloyne at 1.5, 3, 7, 14, 28 and 42  $\mu$ M in the presence of 16.7 mM  
39 glucose (HG, upper row) or 3.3 mM glucose (LG, middle row). Similarly, rat  
40 pancreatic islets were incubated with glucose-free KRB buffer containing vehicle  
41 or cytopiloyne at 1.5, 3, 7, 14, 28 and 42  $\mu$ M (lower row). The insulin levels  
42 were determined using an insulin ELISA kit. The data are presented as mean  $\pm$   
43 SEM of 3 independent experiments. All the results from 3 independent  
44 experiments are expressed as mean  $\pm$  SEM, and  $P$  (\*) < 0.05 was considered to  
45 be statistically significant.

46

47 **Supplemental Figure 4. Cytopiloyne-mediated insulin release depends on**  
48 **calcium and potassium channels.** Rat pancreatic islets were incubated with  
49 KRB buffer containing vehicle or cytopiloyne (CP, 42  $\mu$ M) in the presence of  
50 calcium channel inhibitors (10  $\mu$ M EGTA and 1  $\mu$ M nimodipine (Nimo)) and  
51 potassium channel opener (100  $\mu$ M diazoxide (Diaz)) for 30 min. Insulin levels  
52 in KRB buffer were determined. All the data are presented as mean  $\pm$  SEM of 3  
53 independent experiments and  $P$  (\*) < 0.05 was considered to be statistically  
54 significant.

55

56

# Supplemental Figure 1

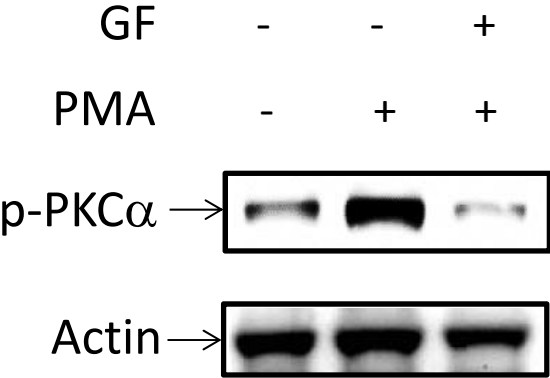

# Supplemental Figure 2

A

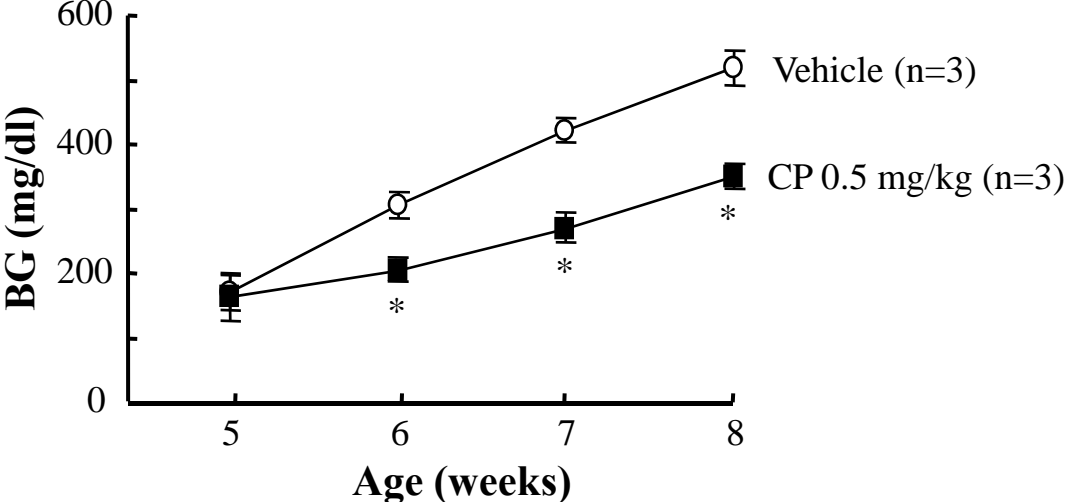

B

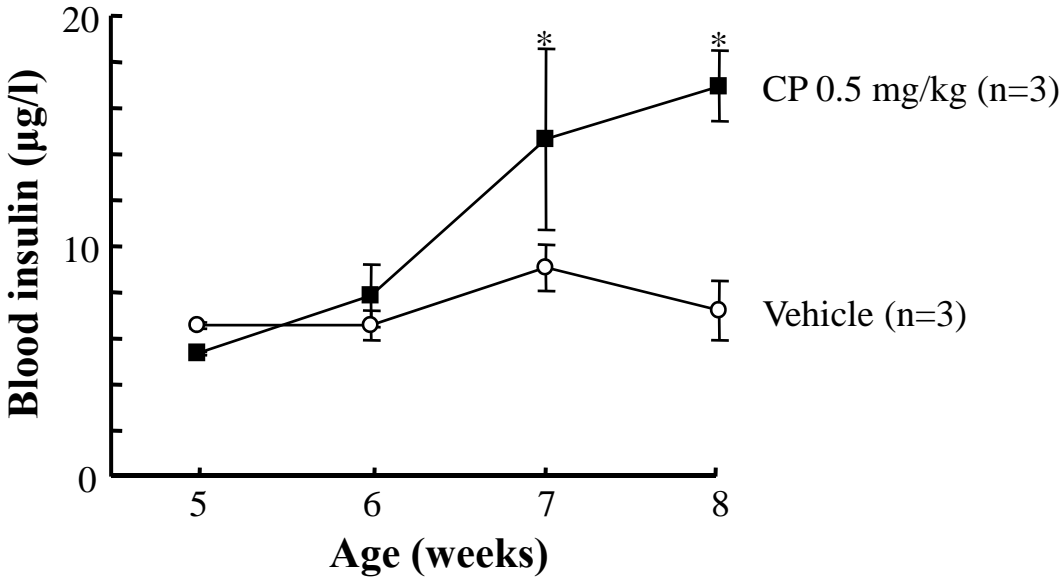

### Supplemental Figure3

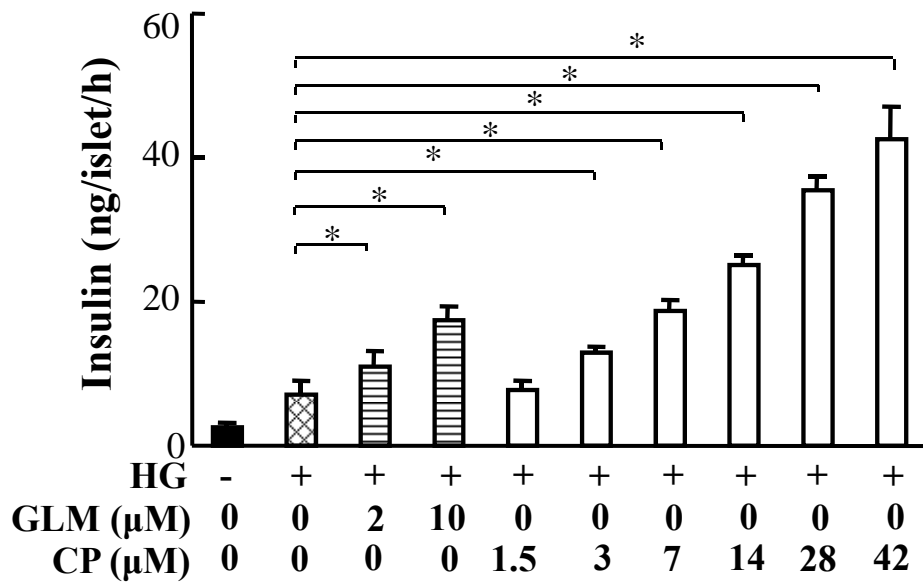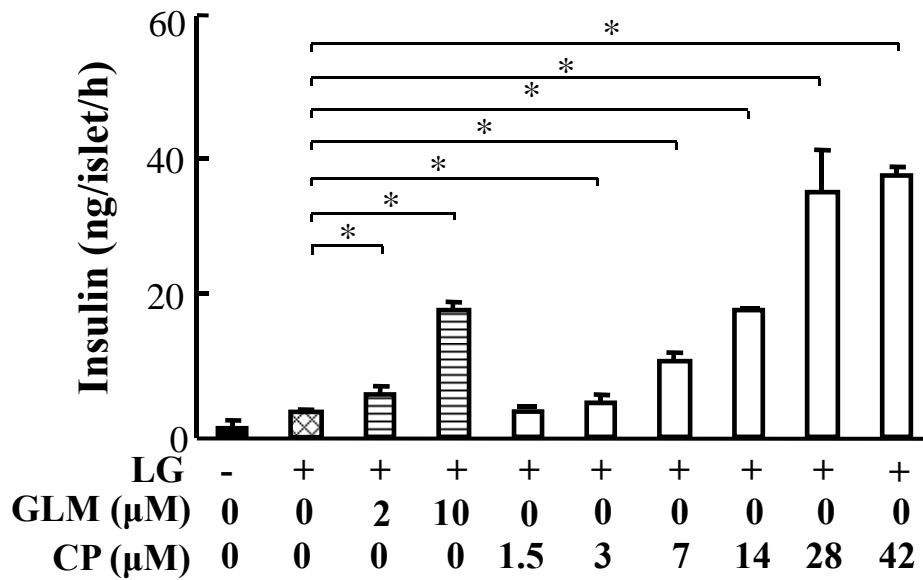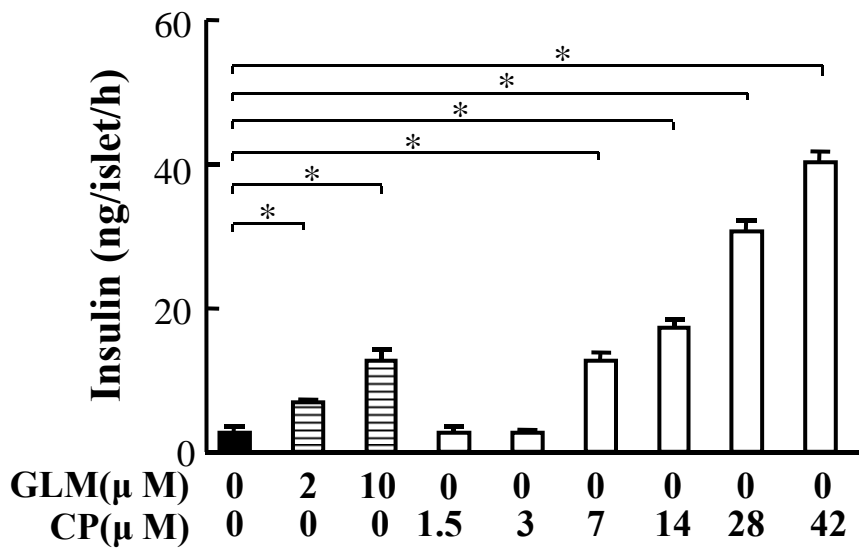

# Supplemental Figure 4

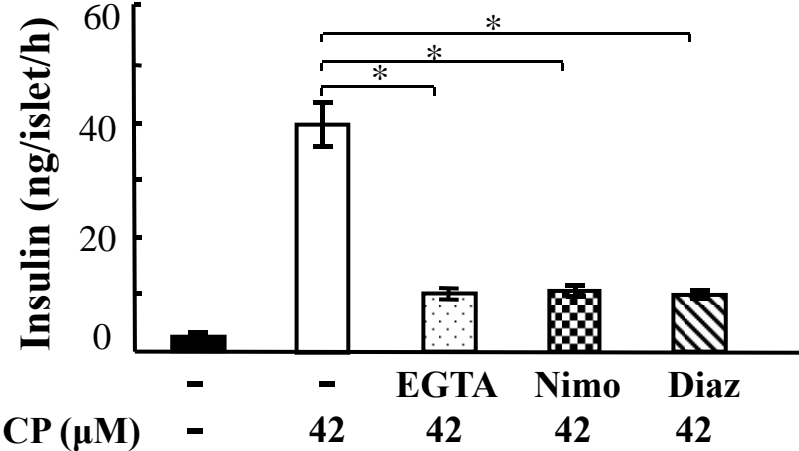

Supplement: f1 [file 685642.f1.pdf]
